# Supplementary material for: Visualizing dopamine released from living cells using a nanoplasmonic probe
Source: Royal Society of Chemistry journal article supplement (doi:10.1039/c5nr04433b), 2015-01-01
Supplement: c5nr04433b1.pdf [file c5nr04433b1.pdf]

### Supplementary Information

Visualizing dopamine released from living cells using a nanoplasmonic probe

W. W. Qin,<sup>a</sup> S. P. Wang,<sup>a</sup> J. Li,<sup>a</sup> T. H. Peng,<sup>a</sup> Y. Xu,<sup>a</sup> K. Wang,<sup>a</sup> J. Y. Shi,<sup>a,b</sup> C. H. Fan,<sup>a</sup> D. Li<sup>\*a</sup>

- a Division of Physical Biology & Bioimaging Centre, Shanghai Synchrotron Radiation Facility, CAS Key Laboratory of Interfacial Physics and Technology, Shanghai Institute of Applied Physics, Chinese Academy of Sciences, Shanghai 201800, China.
- b Kellogg College, Oxford University, U.K

## Contents

|                                                                                      |    |
|--------------------------------------------------------------------------------------|----|
| 1. Experimental Section .....                                                        | S2 |
| 1.1 Materials.....                                                                   | S2 |
| 1.2 DFM Imaging and Scattering Spectroscopy Measurements.....                        | S2 |
| 1.3 DA-induced Seeded-growth of AuNPs.....                                           | S2 |
| 1.4 Imaging and In Situ Detection of Released DA from ATP-stimulated PC12 cells..... | S2 |
| 1.5 Fluorescence Imaging of PC12 Cells Staining with Fluo Calcium Indicator.....     | S2 |
| 2. Supplementary table and figures .....                                             | S3 |
| 2.1 Table S1.....                                                                    | S3 |
| 2.2 Figure S1.....                                                                   | S4 |
| 2.3 Figure S2.....                                                                   | S4 |
| 2.4 Figure S3.....                                                                   | S5 |
| 2.5 Figure S4.....                                                                   | S6 |

## 1. Experimental Section

### 1.1 Materials

Differentiated rat pheochromocytoma (PC12) cell line was purchased from Shanghai Institute of Cell Biology, Chinese Academy of Sciences (Shanghai, China).  $\text{HAuCl}_4 \cdot 3\text{H}_2\text{O}$ , dopamine, catechol (CT), phenethylamine (PEA), tyrosine (TR), epinephrine (EP) and norepinephrine (NE) were purchased from Sigma-Aldrich. Fluo calcium indicator, fluo-4, was purchased from Invitrogen. All other chemicals were of analytical grade and used without further purification. All solutions were prepared with Milli-Q water ( $18.2 \text{ M}\Omega \cdot \text{cm}$ ) from a Millipore system

### 1.2 DFM Imaging and Scattering Spectroscopy Measurements

The dark-field measurements were carried out on an inverted microscope (Olympus IX73, Japan) equipped with a dark-field condenser and a 60x objective lens ( $\text{NA}=0.8$ ). The sample slides are immobilized on the microscopy platform, and a 100 W halogen lamp provided white light source to excite the AuNPs to generate plasmon resonance scattering light. The scattered light was collected by a true-color digital camera (Olympus DP70, Japan) and was also splitted by a monochromator (Acton SP2300i, PI, USA) which was equipped with a grating (grating density: 300 lines/mm; blazed wavelength: 500 nm) and recorded by a spectrograph CCD (CASCADE 512B, Roper Scientific, PI, USA) to obtain the scattering spectra. LSPR spectrum of Au NPs of an individual nanoparticle during the growth process was recorded with a time-interval of 1 min.

### 1.3 DA-induced Seeded-growth of AuNPs

Au NPs with average diameter of 50 nm was synthesized according to a seed-mediated growth method with slight modification. The as-prepared Au NPs was then attached on silanized glass slides. Briefly, a microscopy slide was thoroughly rinsed with ethanol and blow-dried with  $\text{N}_2$ . Then the slide was immersed into an ethanol solution of 1% (3-aminopropyl)trimethoxysilane (V/V) for 1h, followed by successive cleaning with ethanol, blow-drying with  $\text{N}_2$  and heating at  $110 \text{ }^\circ\text{C}$  in an oven for 30 min. AuNPs was drop-cast on the silanized glass slides and then incubated for 3 min. The resulting AuNPs-modified slides were rinsed with water and dried with  $\text{N}_2$ . Zeta potential of the as-prepared Au NPs was measured with a zeta sizer (Nano-zs90, Malvern). The zeta potential was obtained as  $-36.2 \text{ mV}$ , indicating the surface of Au NPs was negatively charged. The DA-induced seeded growth of Au NPs was carried out by drop-cast a growth solution containing  $0.2 \text{ mM HAuCl}_4$  and different concentrations of DA in  $0.01 \text{ M}$  phosphate buffer saline (PBS) ( $\text{pH } 7.2$ ) on the Au NPs-modified slides.

### 1.4 Imaging and In Situ Detection of Released DA from ATP-stimulated PC12 cells

PC12 cells were cultured in DMEM, supplemented with 10% heat-inactivated FBS and antibiotics ( $100 \text{ }\mu\text{g/mL}$  of streptomycin and  $100 \text{ U/mL}$  of penicillin) at  $37 \text{ }^\circ\text{C}$  in the humidified atmosphere with 5%  $\text{CO}_2$ . The cells in a 4-well plate were transferred to a single well and incubated overnight before experiment. Then Au NPs ( $10 \text{ pM}$ ) was added to the medium and incubated for 0.5 h. Before stimulation, the suspended medium was decanted and  $1 \times \text{PBS}$  was added. The slide was then immediately mounted on microscope for experiment. Then a stimulation solution containing  $2 \text{ mM CaCl}_2$  and  $100 \text{ }\mu\text{M}$  ATP was cast on the slide. After 2 min of incubation,  $0.2 \text{ mM HAuCl}_4$  was added and allowed to reaction for 1 min. Then the reaction medium was removed, and  $1 \times \text{PBS}$  was added for dark-field image.

### 1.5 Fluorescence Imaging of PC12 Cells Staining with Fluo Calcium Indicator

A Fluo calcium indicator, fluo-4, was used to stain PC12 cells to indicate the influx of  $\text{Ca}^{2+}$  ions. Living PC12 cells were plated onto poly-L-lysine-coated glass coverslips and incubated with fluo-4 (with a final concentration of  $5 \text{ }\mu\text{M}$ ) at  $37^\circ\text{C}$  for 30 min, and the glass coverslips were washed with  $1 \times \text{PBS}$  to remove the excess of fluo-4. Then the fluorescence images of PC12 cells before and after ATP stimulation were recorded with a confocal laser scanning microscopy (Leica, TCS SP5) in  $1 \times \text{PBS}$  medium. The fluorescent signals from  $\text{Ca}^{2+}$  binding to fluo-4 were recorded at  $516 \text{ nm}$  with excitation of  $488 \text{ nm}$ . Captured images were off-line analyzed with Image J.

## 2. Supplementary table and figures

2.1 Table S1. Comparison of the detection limits of various DA biosensors

| Biosensing technique               | Materials                   | Linear working Range(M) | Detection limit(M) | Ref.                |
|------------------------------------|-----------------------------|-------------------------|--------------------|---------------------|
| Field-effect transistor            | SiNW                        | $10^{-11} - 10^{-8}$    | $10^{-11}$         | [S1] <sup>1</sup>   |
| Colorimetric detection             | MBA-DSP-AuNPs               | $10^{-9} - 10^{-7}$     | $10^{-9}$          | [S2] <sup>2</sup>   |
|                                    | AHMP-AuNPs                  | $10^{-6} - 10^{-5}$     | $10^{-8}$          | [S3] <sup>3</sup>   |
|                                    | HAuCl <sub>4</sub>          | $10^{-6} - 10^{-5}$     | $10^{-6}$          | [S4] <sup>4</sup>   |
| Fluorescence detection             |                             | $10^{-7} - 10^{-5}$     | $10^{-8}$          | [S5] <sup>5</sup>   |
| Electrochemiluminescence detection | CdSe                        | $10^{-8} - 10^{-6}$     | $10^{-9}$          | [S6] <sup>6</sup>   |
| Electrochemical detection          | Hydrogenated carbon surface | $10^{-10} - 10^{-9}$    | $10^{-10}$         | [S7] <sup>7</sup>   |
|                                    | PET                         | $10^{-7} - 10^{-4}$     | $10^{-8}$          | [S8] <sup>8</sup>   |
|                                    | GO                          | $10^{-7} - 10^{-4}$     | $10^{-8}$          | [S9] <sup>9</sup>   |
|                                    | Overoxidized Plmox and GO   | $10^{-5} - 10^{-4}$     | $10^{-7}$          | [S10] <sup>10</sup> |
|                                    | Graphene                    | $10^{-8} - 10^{-5}$     | $10^{-8}$          | [S11] <sup>11</sup> |
|                                    | Glassy carbon               | $10^{-7} - 10^{-5}$     | $10^{-7}$          | [S12] <sup>12</sup> |
|                                    | AuNPs                       | $10^{-6} - 10^{-5}$     | $10^{-6}$          | [S13] <sup>13</sup> |
|                                    | OPPD-coated carbon fiber    | $10^{-8} - 10^{-5}$     | $10^{-8}$          | [S14] <sup>14</sup> |
|                                    | Au/ITO                      | $10^{-9} - 10^{-4}$     | $10^{-9}$          | [S15] <sup>15</sup> |
|                                    | AuNPs/PMT                   | $10^{-8} - 10^{-6}$     | $10^{-8}$          | [S16] <sup>16</sup> |
| Plasmonic detection                | AuNPs                       | $10^{-12} - 10^{-6}$    | $10^{-13}$         | This work           |

2.2 Figure S1. SEM images of Au NPs before (A) and after (B) enlargement by DA.

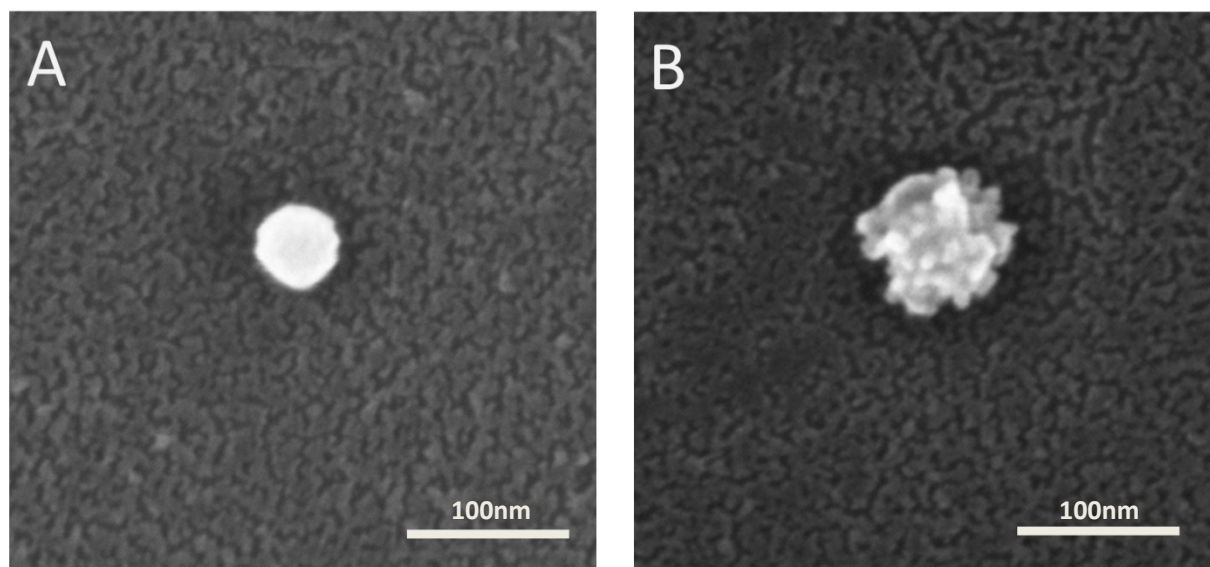

2.3 Figure S2. (A) Dark-field images of the nanoplasmonic probes incubated with living PC12 cells (B) Dark-field images of the nanoplasmonic probes incubated with living PC12 cells after the addition of 0.2 mM HAuCl<sub>4</sub> in the presence of 2 mM CaCl<sub>2</sub> without ATP stimulation. Insets of (A) and (B) are magnified dark-field images of the representative areas in the red square respectively.

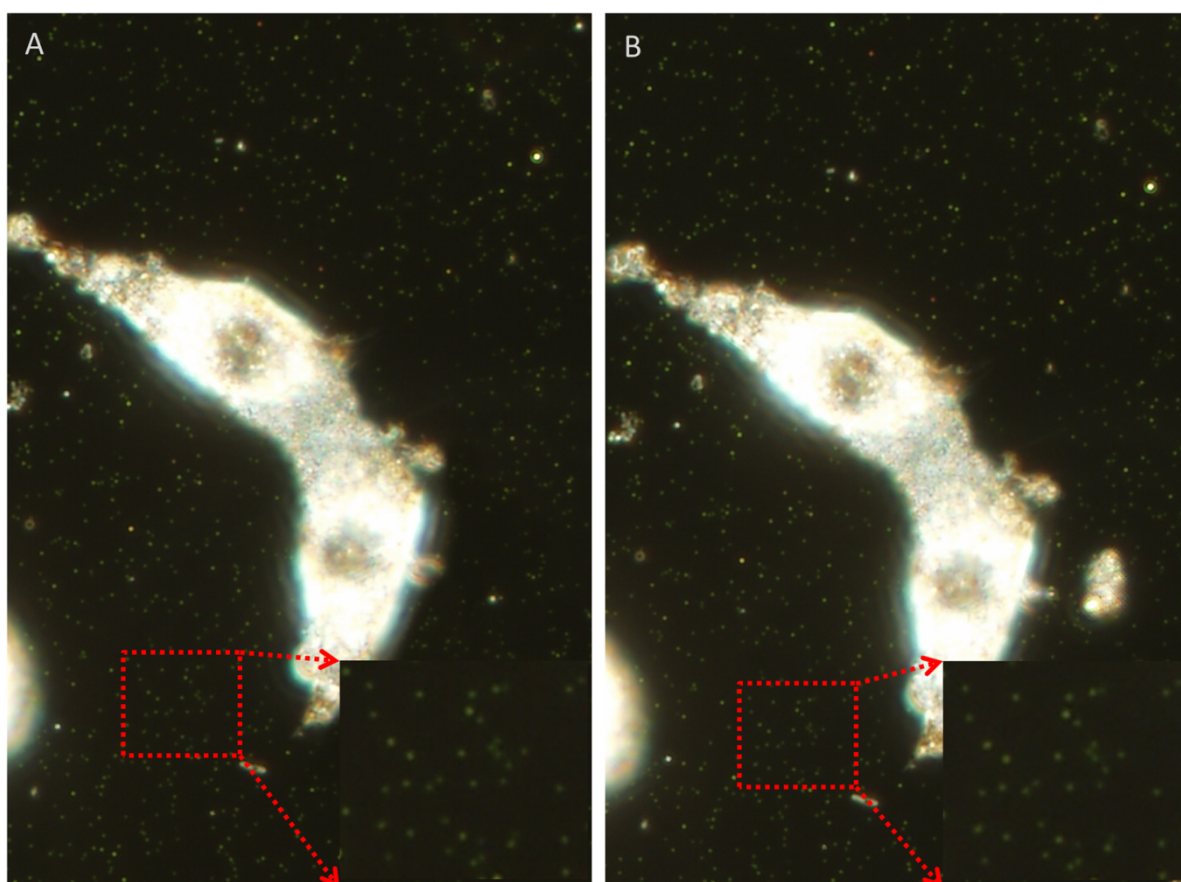

2.4 Figure S3. (A) Dark-field images of the nanoplasmonic probes incubated with living PC12 cells (B) Dark-field images of the nanoplasmonic probes incubated with living PC12 cells after ATP stimulation and the addition of 0.2 mM  $\text{HAuCl}_4$  in the absence of 2 mM  $\text{CaCl}_2$ . Insets of (A) and (B) are magnified dark-field images of the representative areas in the red square respectively.

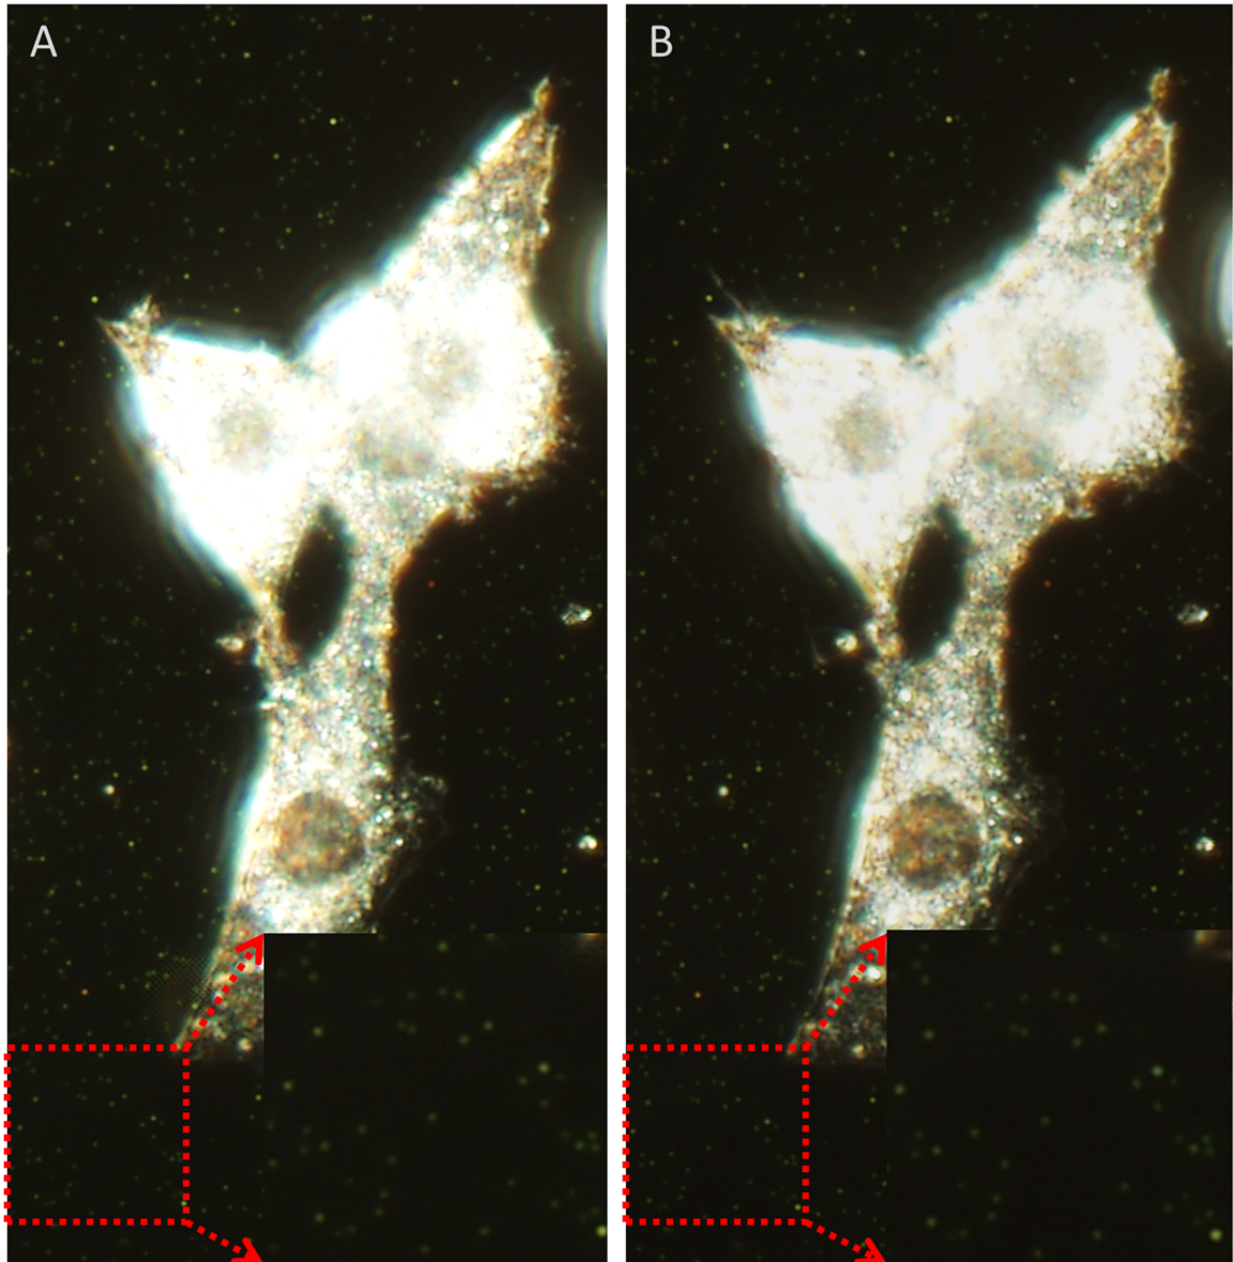



2.5 Figure S4. (A) Dark-field images of the nanoplasmonic probes incubated with living PC12 cells (B) Dark-field images of the nanoplasmonic probes incubated with living PC12 cells after ATP stimulation in the presence of 2 mM CaCl<sub>2</sub> without the addition of 0.2 mM HAuCl<sub>4</sub>. Insets of (A) and (B) are magnified dark-field images of the representative areas in the red square respectively.

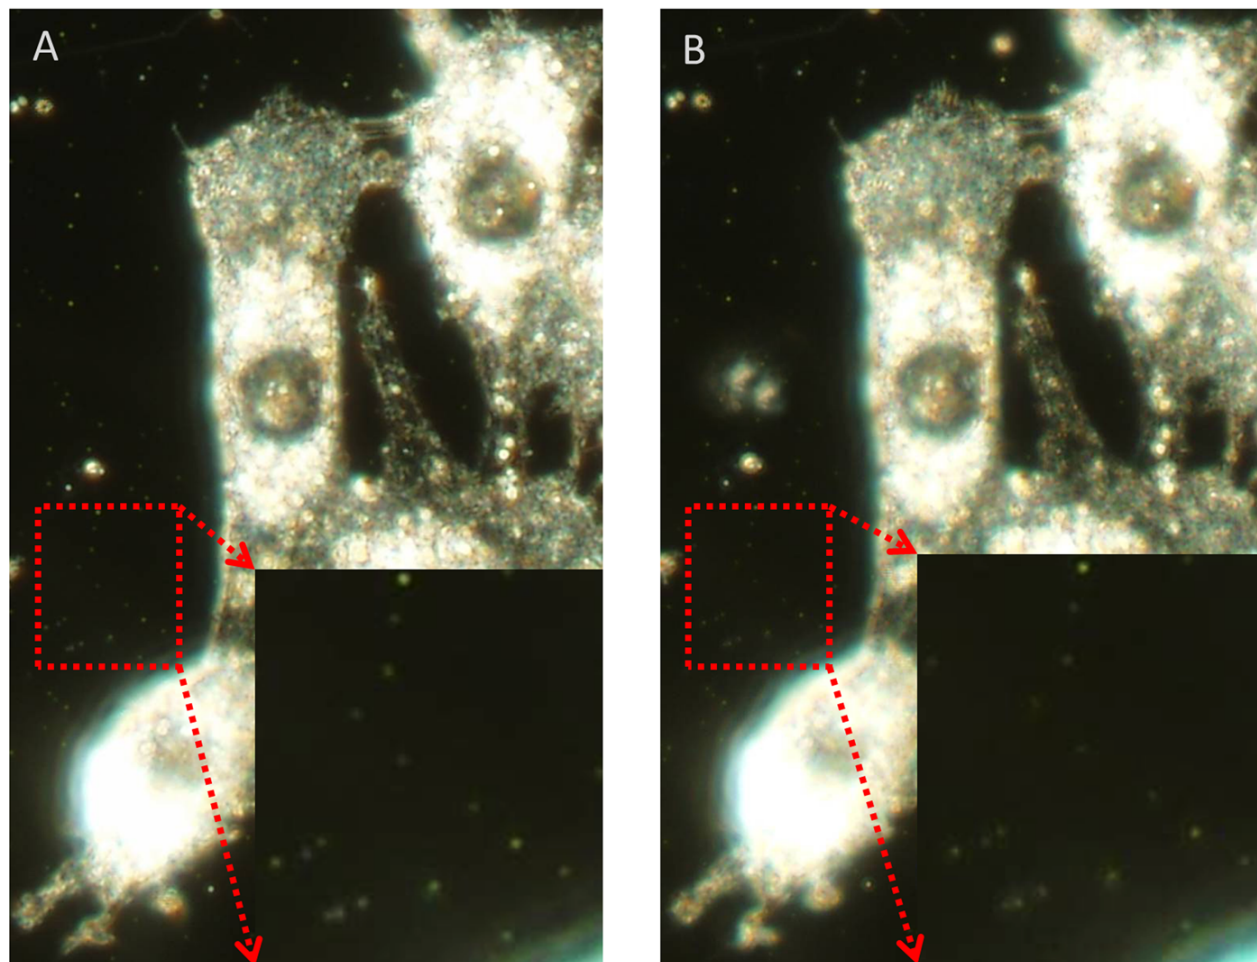

- 1 B. R. Li, Y. J. Hsieh, Y. X. Chen, Y. T. Chung, C. Y. Pan and Y. T. Chen. *J Am Chem Soc*, 2013, **135**, 16034.
- 2 B. Kong, A. Zhu, Y. Luo, Y. Tian, Y. Yu and G. Shi. *Angew Chem Int Ed Engl*, 2011, **50**, 1837.
- 3 J. J. Feng, H. Guo, Y. F. Li, Y. H. Wang, W. Y. Chen and A. J. Wang. *ACS Appl Mater Interfaces*, 2013, **5**, 1226.
- 4 R. Baron, Z. Zayats and I. Willner. *Anal Chem*, 2005, **77**, 1566.
- 5 A. Yildirim and M. Bayindir. *Anal Chem*, 2014, **86**, 5508.
- 6 S. Liu, X. Zhang, Y. Yu and G. Zou. *Anal Chem*, 2014, **86**, 2784.
- 7 S. Chandra, A. D. Miller, A. Bendavid, P. J. Martin and D. K. Wong. *Anal Chem*, 2014, **86**, 2443.
- 8 M. S. Hsu, Y. L. Chen, C. Y. Lee and H. T. Chiu. *ACS Appl Mater Interfaces*, 2012, **4**, 5570.
- 9 W. Wang, G. Xu, X. T. Cui, G. Sheng and X. Luo. *Biosens Bioelectron*, 2014, **58**, 153.
- 10 X. Liu, L. Zhang, S. Wei, S. Chen, X. Ou and Q. Lu. *Biosens Bioelectron*, 2014, **57**, 232.
- 11 L. Wu, L. Feng, J. Ren and X. Qu. *Biosens Bioelectron*, 2012, **34**, 57.
- 12 A. Liu, M. D. Wei, I. Honma and H. Zhou. *Advanced Functional Materials*, 2006, **16**, 371.
- 13 C. R. Raj, T. Okajima and T. Ohsaka. *Journal of Electroanalytical Chemistry*, 2003, **543**, 127.
- 14 J. W. Mo and B. Ogorevc. *Anal Chem*, 2001, **73**, 1196.

- 15 R. N. Goyal, V. K. Gupta, M. Oyama and N. Bachheti. *Talanta*, 2007, **72**, 976.
- 16 R. Ojani, J.-B. Raoof, A. A. Maleki and S. Safshekan. *Chinese Journal of Catalysis*, 2014, **35**, 423.
